# Supplementary material
Source: PubMed Central journal article supplement (PMC8114189)
Supplement: 41574_2021_509_MOESM1_ESM.pdf [file 41574_2021_509_MOESM1_ESM.pdf]

**Supplementary information**

---

**Glucose-lowering treatments and COVID-19 mortality in T2DM**

---

In the format provided by the authors and unedited

**Table 1: Current COVID-19 prospective trials on glucose-lowering treatment interventions in patients with T2DM**

| Clinical trial number <sup>a</sup> | Placebo controlled                     | N     | Inclusion criteria                                                                                                                                  | Primary outcomes                                                                                                     |
|------------------------------------|----------------------------------------|-------|-----------------------------------------------------------------------------------------------------------------------------------------------------|----------------------------------------------------------------------------------------------------------------------|
| <b>Drug tested: metformin</b>      |                                        |       |                                                                                                                                                     |                                                                                                                      |
| 04510194                           | Yes                                    | 750   | Non-hospitalized adults with SARS-CoV-2 infection                                                                                                   | Decreased oxygenation (SO <sub>2</sub> ≤93% on home monitoring)                                                      |
| 04625985                           | Yes                                    | 20    | Hospitalized patients with COVID-19 patients and severe acute respiratory syndrome                                                                  | Multiple primary outcomes (viral load, oxygen saturation, length of hospital stay among others)                      |
| 04727424                           | Yes (metformin + 2 other ID)           | 2,724 | Adults with SARS-CoV-2 positive PCR, flu-like symptoms lasting <7 days and enhancement factors (including age >50 years, chronic conditions)        | Need for emergency care and observation for more than 6 hours due to the worsening of COVID-19                       |
| <b>Drug tested: pioglitazone</b>   |                                        |       |                                                                                                                                                     |                                                                                                                      |
| 04604223                           | Yes                                    | 1,506 | COVID-19 infection confirmed with PCR test and ≥1 COVID-19 symptoms                                                                                 | Multiple primary outcomes (hs-CRP level; composite outcome of mechanical ventilation, myocardial damage or death).   |
| 04535700                           | No                                     | 76    | Confirmed diagnosis of COVID-19 or high clinical suspicion according to current criteria                                                            | Composite outcome: mechanical ventilation, ICU and/or death                                                          |
| 04473274                           | No                                     | 20    | Laboratory confirmed COVID-19 requiring hospitalization                                                                                             | Adverse events outcomes without attribution // attributable                                                          |
| <b>Drug tested: linagliptin</b>    |                                        |       |                                                                                                                                                     |                                                                                                                      |
| 04542213                           | No, linagliptin + insulin vs insulin   | 70    | Hospitalized patients with confirmed infection by SARS-CoV-2 and hyperglycaemia                                                                     | Glucose levels during hospitalization                                                                                |
| 04371978                           | No, linagliptin + insulin vs insulin   | 100   | Patients within 10 days of symptom onset or patients within 48 hours after laboratory diagnosis (SARS-CoV-2 PCR).                                   | Clinical change as 2 points reduction in the WHO Ordinal Scale for Clinical Improvement of COVID-19                  |
| <b>Drug tested: dapagliflozine</b> |                                        |       |                                                                                                                                                     |                                                                                                                      |
| 04393246                           | No, dapagliflozine + 2 other ID vs SOC | 1,407 | Clinical picture strongly suggestive of COVID-19-related disease and risk count >3 or risk count ≥3 and radiographic severity score >3 <sup>b</sup> | Change in biomarkers associated with progression of COVID-19 // clinical status as assessed on 7-point ordinal scale |
| 04350593                           | Yes                                    | 1,250 | Hospitalized patients with respiratory manifestations of COVID-19 of any duration, without the need for mechanical ventilation                      | Prevention of COVID-19 complications or death: // Improving clinical recovery                                        |

<sup>a</sup>Actively-recruiting or completed trials registered on Clinicaltrial.gov (accessed on 13 April 2021); <sup>b</sup>Patients are given a risk count equal to the cumulative points received for specific risk criteria. COVID-19, coronavirus disease 2019; ID, investigation drug(s); SARS-CoV-2, severe acute respiratory syndrome coronavirus 2; SOC, standard of care; WHO, World Health Organization.
